# Supplementary material for: Predictive Validity of the Air Force Officer Qualifying Test (AFOQT) for Pilot Performance
Source: Atypon-hosted journal article supplement (doi:10.1027/2192-0923/a000190), 2020-07-15
Supplement: 2192-0923_a000190_esm1.pdf [file 2192-0923_a000190_esm1.pdf]

**Supplemental Materials for**  
**Predictive Validity of the Air Force Officer Qualifying Test (AFOQT) for Pilot Performance:**  
**A Meta-analytic Investigation at the Subtests Level**

Correlation Coefficients Accumulated for the Relationships Between AFOQT Scores and Flight Performance Scores

*Table S1. AFOQT Subtests-Flight Performance Relationships*

| Study | VA   | AR  | RC   | DI  | WK   | MK   | MC  | EM  | SR  | IC  | BC  | TR  | AI  | RB  | GS   | HF  | Criteria           |
|-------|------|-----|------|-----|------|------|-----|-----|-----|-----|-----|-----|-----|-----|------|-----|--------------------|
| 1     | -.05 | .04 | -.04 | .09 | -.11 | -.01 | .11 | .05 | .09 | .34 | .04 | .06 | .27 | .11 | .02  | .05 | Pass/Fail*         |
| 3-A   | .01  | .06 |      |     | .01  | .04  |     |     |     | .08 | .06 | .08 | .06 |     | .03  |     | First OPR*         |
| 3-B   | .02  | .07 |      |     | -.02 | .07  |     |     |     | .06 | .05 | .13 | .04 |     | .03  |     | Third OPR*         |
| 4     |      |     |      |     |      |      |     |     |     |     |     | .14 |     | .12 |      | .10 | DFA                |
|       |      |     |      |     |      |      |     |     |     |     |     | .15 |     | .08 |      | .06 | CFA                |
|       |      |     |      |     |      |      |     |     |     |     |     | .18 |     | .13 |      | .10 | Overall Composite* |
| 10-A  | .01  | .08 | -.01 | .09 | -.02 | .07  | .08 | .06 | .11 | .14 | .07 | .09 | .07 | .07 | .03  | .05 | Pass/Fail*         |
| 10-B  | -.08 | .16 | .05  | .05 | -.03 | .16  | .02 | .06 | .13 | .12 | .09 | .04 | .14 | .07 | .12  | .10 | Pass/Fail*         |
| 14    | .00  | .10 | .06  | .13 | .05  | .00  | .11 | .03 | .16 | .18 | .07 | .11 | .25 | .05 | .07  | .03 | PH2 DFA            |
|       | .03  | .13 | .04  | .14 | .00  | .08  | .11 | .06 | .17 | .19 | .09 | .14 | .19 | .09 | .06  | .06 | PH2 CFA            |
|       | -.03 | .05 | .01  | .06 | -.01 | .01  | .03 | .02 | .08 | .08 | .04 | .08 | .07 | .02 | -.01 | .00 | PH3 DFA            |
|       | .00  | .08 | .01  | .09 | -.02 | .05  | .05 | .03 | .13 | .11 | .07 | .12 | .05 | .06 | .00  | .03 | PH3 CFA            |
|       | .13  | .20 | .17  | .17 | .13  | .18  | .14 | .03 | .16 | .07 | .07 | .10 | .11 | .08 | .16  | .06 | Academic           |
|       | .04  | .16 | .08  | .17 | .04  | .09  | .13 | .05 | .21 | .19 | .10 | .16 | .20 | .09 | .08  | .05 | Overall Composite* |
| 17    | .03  | .12 | .05  | .16 | .01  | .11  | .12 | .03 | .18 | .18 | .09 | .15 | .19 | .10 | .06  | .09 | Class Rank*        |
|       | -.02 | .06 | -.01 | .12 | -.04 | .05  | .07 | .01 | .12 | .13 | .06 | .10 | .14 | .05 | .02  | .05 | FT37               |
|       | -.01 | .04 | .01  | .09 | .01  | .07  | .03 | .01 | .12 | .15 | .05 | .09 | .12 | .09 | .00  | .06 | FT38               |
| 18    | .13  |     |      |     | .03  |      | .10 | .13 | .19 |     | .18 | .17 |     | .08 |      | .05 | Pass/Fail*         |
|       | .19  |     |      |     | .15  |      | .12 | .14 | .16 |     | .15 | .08 |     | .10 |      | .03 | Pass/Fail (FTD)    |
| 21    | .00  | .11 | .03  | .12 | -.02 | .04  | .10 | .08 | .17 | .23 | .10 | .15 | .18 | .10 | .04  | .06 | Pass/Fail          |
|       | .10  | .13 | .04  | .15 | -.02 | .07  | .15 | .07 | .20 | .26 | .09 | .12 | .24 | .10 | .04  | .04 | PH2 CFA            |
|       | .01  | .07 | .01  | .07 | -.02 | .03  | .08 | .08 | .12 | .15 | .09 | .13 | .10 | .05 | .01  | .07 | PH3 CFA            |

| Study        | VA        | AR        | RC        | DI        | WK        | MK        | MC        | EM        | SR        | IC        | BC        | TR        | AI        | RB        | GS        | HF        | Criteria        |
|--------------|-----------|-----------|-----------|-----------|-----------|-----------|-----------|-----------|-----------|-----------|-----------|-----------|-----------|-----------|-----------|-----------|-----------------|
|              | .00       | .14       | .04       | .16       | -.01      | .06       | .16       | .07       | .20       | .28       | .09       | .12       | .27       | .10       | .04       | .04       | Phase 2 Average |
|              | .00       | .08       | .02       | .08       | -.02      | .03       | .09       | .09       | .13       | .17       | .11       | .13       | .12       | .06       | .02       | .07       | Phase 3 Average |
|              | .00       | .12       | .10       | .12       | -.02      | .04       | .11       | .09       | .18       | .23       | .10       | .15       | .21       | .08       | .04       | .08       | Overall*        |
| 22           | .16       | .12       | .17       | .16       | .13       | .18       |           |           | .14       | .12       |           |           | .13       |           |           |           | Academic 1      |
|              | .17       | .17       | .16       | .12       | .15       | .15       |           |           | .10       | .09       |           |           | .10       |           |           |           | Academic 2      |
|              | .14       | .14       | .14       | .14       | .12       | .16       |           |           | .12       | .09       |           |           | .09       |           |           |           | Academic 3      |
|              | .14       | .17       | .16       | .14       | .11       | .17       |           |           | .11       | .11       |           |           | .11       |           |           |           | Academic 4      |
|              | .12       | .16       | .11       | .12       | .06       | .16       |           |           | .14       | .05       |           |           | .03       |           |           |           | Academic 5      |
|              | .08       | .16       | .09       | .12       | .07       | .12       |           |           | .11       | .05       |           |           | .07       |           |           |           | Academic 6      |
|              | .12       | .14       | .12       | .19       | .10       | .15       |           |           | .13       | .07       |           |           | .10       |           |           |           | Academic 7      |
|              | .11       | .18       | .12       | .14       | .10       | .12       |           |           | .14       | .06       |           |           | .08       |           |           |           | Academic 8      |
|              | .14       | .14       | .15       | .12       | .11       | .16       |           |           | .11       | .06       |           |           | .07       |           |           |           | Academic 19     |
|              | .13       | .14       | .15       | .14       | .11       | .22       |           |           | .15       | .05       |           |           | .03       |           |           |           | Academic 10     |
|              | .12       | .19       | .12       | .16       | .08       | .18       |           |           | .15       | .06       |           |           | .05       |           |           |           | Academic 11     |
|              | .01       | .07       | .00       | .08       | .00       | .05       |           |           | .10       | .10       |           |           | .08       |           |           |           | CFA 1           |
|              | .05       | .08       | .03       | .10       | .02       | .07       |           |           | .11       | .09       |           |           | .05       |           |           |           | CFA 2           |
|              | .06       | .09       | .06       | .10       | .03       | .12       |           |           | .13       | .08       |           |           | .04       |           |           |           | CFA 3           |
|              | .01       | .06       | .02       | .08       | .01       | .07       |           |           | .10       | .10       |           |           | .03       |           |           |           | CFA 4           |
|              | .03       | .04       | .01       | .06       | .00       | .05       |           |           | .06       | .09       |           |           | .02       |           |           |           | CFA 5           |
|              | .05       | .08       | .06       | .10       | .02       | .12       |           |           | .13       | .08       |           |           | .01       |           |           |           | CFA 6           |
|              | .06       | .12       | .05       | .15       | .02       | .14       |           |           | .18       | .16       |           |           | .07       |           |           |           | CFA Composite*  |
| 24           | -.04      | .05       | -.06      | .03       | -.09      | -.03      | .02       | .01       | .03       | .22       | .08       | .06       | .17       | .10       | .00       | .03       | Pass/Fail       |
|              | .04       | .13       | .07       | .11       | -.03      | .04       | .10       | .04       | .10       | .16       | -.01      | .12       | .12       | .05       | .02       | .05       | ATRB*           |
| 26           | .09       | .18       | .06       | .16       | .00       | .23       | .04       | .10       | .15       | .13       | .15       | .19       | -.01      | .08       | .12       | .12       | Pass/Fail*      |
| <b>Total</b> | <b>43</b> | <b>41</b> | <b>39</b> | <b>39</b> | <b>43</b> | <b>41</b> | <b>23</b> | <b>23</b> | <b>41</b> | <b>41</b> | <b>25</b> | <b>28</b> | <b>41</b> | <b>26</b> | <b>23</b> | <b>26</b> |                 |

Note. References of studies can be found in the article; gray rows are for coefficient composites that were computed by the authors; criteria followed with “\*” are for those used to estimate the relationships with the overall flight performance; OPR = Officer Performance Report (overall performance ratings given to the officer by his leaders in charge); FT = excess flying hours in primary training (37 for phase 2 and 38 for phase 3); CFA = Check Flight Average; DFA = Daily Flight Average; PH = phase; ATRB = Advanced Training Recommendation Board; FTD = Flying Training Deficiency; VA = Verbal Analogies; RC = Reading Comprehension; WK = Word Knowledge; AR = Arithmetic Reasoning; DI = Data Interpretation; MK = Math Knowledge; MC = Mechanical Comprehension; EM = Electrical Maze; BC = Block Counting; RB = Rotated Blocks; HF = Hidden Figures; SR = Scale Reading; TR = Table Reading; IC = Instrument Comprehension; AI = Aviation Information; GS = General Science.

Table S2. *AFOQT Pilot Composite-Flight Performance Relationships*

| Study | Total Reported | Pass/Fail   | Overall     | Class Rank  | Daily Flying | Check Flight | Academic | Flying hours | Other                         |
|-------|----------------|-------------|-------------|-------------|--------------|--------------|----------|--------------|-------------------------------|
| 1     | 1              | <b>.210</b> |             |             |              |              |          |              |                               |
| 2     | 2              | .150        | <b>.230</b> |             |              |              |          |              |                               |
| 3-A   | 1              |             | <b>.098</b> |             |              |              |          |              |                               |
| 3-B   | 1              |             | <b>.105</b> |             |              |              |          |              |                               |
| 5     | 1              | <b>.158</b> |             |             |              |              |          |              |                               |
| 6     | 2              | .120        |             |             |              |              |          |              | <b>.140</b> (ATRB)            |
| 7     | 2              | .109        |             |             |              |              |          |              | <b>.138</b> (ATRB)            |
| 8     | 2              | .090        |             |             |              |              |          |              | <b>.090</b> (ATRB)            |
| 9     | 4              | .120        |             | <b>.130</b> |              |              |          | .130         | .180 (Another suggested Rank) |
| 10-A  | 1              | <b>.155</b> |             |             |              |              |          |              |                               |
| 10-B  | 1              | <b>.143</b> |             |             |              |              |          |              |                               |
| 11    | 2              | .193        | <b>.217</b> |             |              |              |          |              |                               |
| 12    | 5              | .132        | <b>.273</b> |             | .275         | .162         | .187     |              |                               |
| 13    | 2              | .168        |             | <b>.200</b> |              |              |          |              |                               |
| 15-A  | 1              | <b>.100</b> |             |             |              |              |          |              |                               |
| 15-B  | 1              | <b>.090</b> |             |             |              |              |          |              |                               |
| 16    | 2              | <b>.160</b> |             |             |              |              |          |              | .170 (Attrition)              |
| 19    | 1              | <b>.180</b> |             |             |              |              |          |              |                               |
| 18    | 2              | <b>.150</b> |             |             |              |              |          |              | .100 Pass/Fail (FTD)          |
| 20    | 1              | <b>.160</b> |             |             |              |              |          |              |                               |
| 23-A  | 1              | <b>.219</b> |             |             |              |              |          |              |                               |
| 23-B  | 1              | <b>.112</b> |             |             |              |              |          |              |                               |
| 23-C  | 1              | <b>.127</b> |             |             |              |              |          |              |                               |
| 23-D  | 1              | <b>.157</b> |             |             |              |              |          |              |                               |
| 25    | 1              | <b>.160</b> |             |             |              |              |          |              |                               |

Note. References of studies can be found in the article; bold coefficients are those used in the meta-analyses of the overall flight performance; the last column contains the coefficients used for the overall performance; ATRB = Advanced Training Recommendation Board; FTD = Flying Training Deficiency.
